# Supplementary figures and images for: Curcumin-Mediated Sono-Photodynamic Treatment Inactivates Listeria monocytogenes via ROS-Induced Physical Disruption and Oxidative Damage
Source: MDPI journal article supplement (doi:10.3390/foods11060808), 2022-03-11

**Supplementary Figure S1**

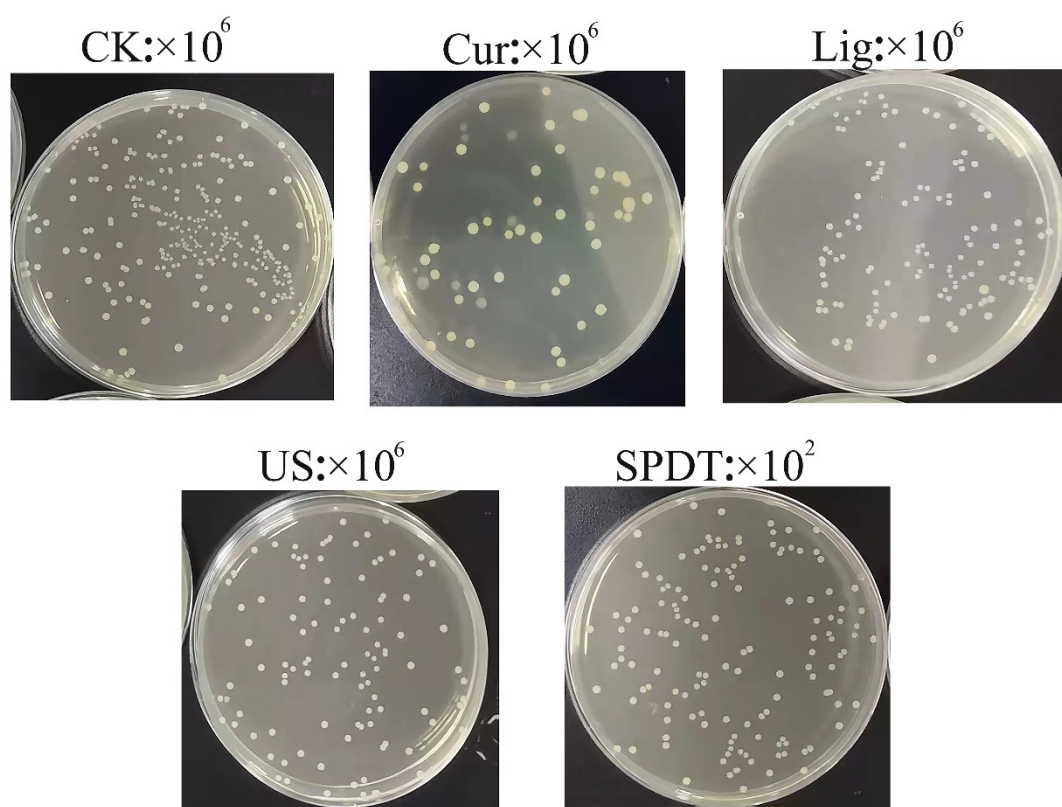

**Representative plate pictures of LMO in CFU counting assay.**

Supplement: s1 [file s1]
